# Supplementary material
Source: PubMed Central journal article supplement (PMC3761632)
Supplement: 1308085110_pnas.201308085SI.pdf [file 1308085110_pnas.201308085SI.pdf]

# Supporting Information

Vega et al. 10.1073/pnas.1308085110

## SI Materials and Methods

**Bacterial Strains and Strain Construction.** All experiments were performed using laboratory strains of *Escherichia coli* and *Salmonella enterica* serovar Typhimurium. Ancestral wild-type *E. coli* K-12 EMG2 + fertility factor plasmid (F+) obtained from Yale *E. coli* Genetic Stock Center (ECGC 4401) was the reference wild-type *E. coli* strain used in all experiments, and *S. typhimurium* LT2 [American Type Culture Collection (ATCC) 700720] was the reference strain of nontyphoidal *Salmonella* (1–4). Single-gene knockout mutants were constructed from an *E. coli* Kan<sup>R</sup> knockout library (5) via lambda Red transduction (6) into wild type. All *Salmonella* knockouts and any *E. coli* mutants not available in the knockout library were constructed using the Datsenko-Wanner PCR products method (6). PCR primers for the Datsenko-Wanner method were designed using Oligocalc (7) and obtained from Integrated DNA Technologies. Strains and primers used in this study are presented in Table S1.

Rescue plasmids were constructed using the pZ system (8). Purification of restriction digest products and PCR products was performed using commercially available kits (Qiagen). Cloning primers contained an ~8-bp GC-rich leader sequence, a restriction site for plasmid insertion, and a ~26-bp homology sequence overlying the START or STOP codon of the gene of interest (Table S1). Genes for complementation were cloned from *E. coli* EMG2 using hot-start Phusion PCR (Sigma-Aldrich). PCR products and the parent plasmid pZA21-GFP were digested using KpnI/BamIII and ligated using T4 DNA ligase (Sigma-Aldrich), replacing the GFP cassette with the gene of interest.

*E. coli* strains were transfected with the spectinomycin-resistant Pro cassette to enable activation from the P<sub>Ltet0-1</sub> promoter. Strains were then made electrocompetent by washing twice in ice-cold sterile water and twice in ice-cold sterile 10% glycerol. Electrocompetent strains were incubated 20 min with plasmid in cold 10% (vol/vol) glycerol before electroporation at 2,400 V. Plasmid-transformed cells were inoculated in super optimal broth with catabolite repression (SOC) media and incubated 1 h at 37 °C to allow expression of plasmid-based resistance genes before addition of the appropriate antibiotic for selection.

**Antibiotics and Chemicals.** The following concentrations of antibiotics were used in this study: 100 µg/mL ampicillin or carbenicillin, 10–60 µg/mL kanamycin, 0.5–2 µg/mL ciprofloxacin, and 1–5 µg/mL ofloxacin. Strains containing kanamycin-resistance plasmids were grown with 30–60 µg/mL kanamycin for selection, and strains containing spectinomycin-resistance cassettes were grown with 50 µg/mL spectinomycin. Otherwise, antibiotic treatments were ≥10× minimum inhibitory concentration (MIC) to ensure killing of sensitive cells (9). All antibiotics were purchased from Sigma-Aldrich. L-tryptophan, indole [≥99%, Food Chemicals Codex (FCC)], and hydrogen peroxide [American Chemical Society (ACS) reagent, stock strength 30%] were purchased from Sigma-Aldrich.

In all experiments, cultures were grown in media containing antibiotics for plasmid selection (35 µg/mL kanamycin), and 25–50 ng/mL anhydrotetracycline (aTc) was added after 2–4 h growth for induction of plasmid-borne genes.

**Growth and Tolerance Assays.** All experiments were performed in accordance with standard protocols unless otherwise stated. Briefly, bacterial cultures were grown in light-insulated shakers at 37 °C with shaking at 300 rpm (14-mL Falcon tubes, Fisher

Scientific) or 900 rpm (96-well, clear, flat-bottom culture plates, Fisher Scientific; with Breathe-Easy adhesive gas-permeable membrane, USA Scientific). Cultures were grown in tryptophan-free minimal medium [M9 + 0.2% Casamino acids + 0.4% (wt/vol) glucose, M9CG, pH >7.2] or in rich media (LB).

MIC was determined via growth assay in 96-well plates, using log<sub>2</sub> dilution series of antibiotics (10).

Antibiotic tolerance was assessed by incubating cultures for at least 3 h with antibiotic to allow full killing of sensitive cells (11, 12). For stationary-phase cultures, ciprofloxacin treatment was used for killing of sensitive cells, as quinolones have bactericidal activity against stationary-phase bacteria (11, 13, 14). Ten microliters of culture medium was removed before addition of antibiotic and after antibiotic challenge for serial dilution in 1× PBS, and serial dilutions were spot-plated onto LB agar (10-µL spots). Serial dilution plates were allowed to grow overnight at 37 °C, and colony counts were used to calculate cfu/mL. The cfu measurements before and after antibiotic treatment were compared to determine survival.

The *S. typhimurium* oxidative stress response ( $\Delta oxyR$ ) mutant, despite lacking a homolog to the *E. coli* flocculation gene (*flu*) (15), strongly self-aggregates, making dilution plating difficult. In tolerance assays where this strain was used (Fig. 2), all samples were collected by spinning 2 min at ~7,600 × g in a tabletop centrifuge, washed twice in 10 volumes sterile 1× PBS, and resuspended in one volume sterile 1× phosphosaline (pH 4) + 0.5% Tween-20 by pipetting and vortexing. All strains used in these assays were treated identically to ensure consistency. Serial dilution was performed in resuspension buffer, and dilutions were immediately plated onto LB agar. As we were unable to clear the antibiotic-resistance cassette from  $\Delta oxyR$  and phage shock response ( $\Delta pspBC$ ) strains using pCP20 (6), tolerance assays using these knockouts were performed with *S. typhimurium* LT2 nitrate reductase 2 mutant bearing a chloramphenicol resistance cassette ( $\Delta narV::CmR$ ) (described in the next section) as the reference strain.

**Coculture of *E. coli* and *S. typhimurium*.** *E. coli* Pro was inoculated 1:200 from overnight LB cultures into M9CG containing 0–2 mM tryptophan, then dispensed in 150-µL aliquots into a flat-bottomed clear 96-well culture plate, covered with Breathe-Easy gas-permeable membrane, and incubated at 37 °C as previously described for 16 h (stationary phase). *S. typhimurium* was inoculated 1:500 from overnight LB cultures into M9CG, aliquoted into a 96-well plate, and grown under identical conditions for 3.5 h (exponential phase) before coculture. Twenty percent of stationary-phase *E. coli* cultures was removed and replaced with an equal volume of exponential-phase *S. typhimurium* culture, a fresh gas-permeable membrane was applied, and cocultures were returned to incubation for 1 h before treatment with 2 µg/mL ciprofloxacin. Cultures were incubated 6 h with ciprofloxacin before dilution plating onto selective media (25 µg/mL spectinomycin for *E. coli* or 25 µg/mL chloramphenicol for *S. typhimurium*).

The *S. typhimurium* LT2  $\Delta narV::CmR$  knockout was generated to allow separation of bacterial strains. The *narV* gene was selected for deletion because the activity encoded by this gene (nitrate reductase) is functionally redundant in *S. typhimurium* LT2 (16).

**Growth of *S. typhimurium* on Conditioned Media.** Conditioned media was prepared by inoculating 1 mL M9CG + 1 mM tryptophan

tophan 1:200 from overnight cultures of LT2, EMG2 wild type, and EMG2  $\Delta$ *tnaA* and growing to stationary phase. *S. typhimurium*-conditioned media was used as the control condition. Cultures were pelleted in a tabletop centrifuge (2 min at 6,000  $\times$  g), and supernatant was sterilized by syringe filtration with a 0.22- $\mu$ m filter. Sterility of conditioned media was confirmed by incubating filtered media overnight at 37 °C under standard culture conditions. *S. typhimurium* was inoculated 1:200 from overnight culture into 150  $\mu$ L M9CG in 96-well plate and covered with a gas-permeable membrane before incubation. After 1 h, these cultures were mixed with conditioned media (30% exponential-phase culture in 70% conditioned media, final volume 150  $\mu$ L); cultures were incubated 3.5 h further before treatment with ciprofloxacin (0.5  $\mu$ g/mL) to assess tolerance. All cultures were incubated at 37 °C with shaking.

**Indole Quantification.** Indole quantification was performed via HPLC using a protocol based on (17), (18), and (19). Cell-free medium for quantification of extracellular indole was obtained by centrifugation of whole culture (6,000  $\times$  g, tabletop centrifuge) and purification of the resulting supernatant on Spin-X filter columns. HPLC was performed using a Waters C<sub>18</sub> (5  $\mu$ m, 4.6  $\times$  150) column with H<sub>2</sub>O + 0.1% (vol/vol) formic acid/acetonitrile (1:1) as the isocratic mobile phase. Under these conditions, in M9 + 0.2% casamino acids + 0.4% glucose, indole eluted at ~4.8 min as a single peak at 271 nm. A series of indole standards (12.5–600  $\mu$ M) in sterile growth medium was used to estimate indole concentration as a linear function of peak height.

**Quantitative PCR.** RNA was collected from indole-treated and untreated cultures of *S. typhimurium* LT2. Cultures were inoculated 1:500 from overnight LB cultures into 1 mL of M9CG in 14-mL Falcon tubes and incubated 3.5 h before treatment with indole. After 30-min incubation with indole (0, 50, or 125  $\mu$ M), cultures were stabilized with RNAprotect Bacteria Reagent (Qiagen) according to the manufacturer's protocol, and the resulting cell pellets were stored overnight at –80 °C. RNA extraction was performed using RNeasy Mini Kit (Qiagen), and DNA contamination was eliminated using TURBO DNA-Free (Ambion) according to the manufacturers' protocols. Sample concentration was estimated using the ND-1000 NanoDrop spectrophotometer. Standard PCR using Taq polymerase and qPCR primers (see below for primer information) was used to test for DNA contamination in RNA samples after TURBO DNA-Free digestion (4% RNA suspension by volume, 30–35 cycles). RNA was stored at –80 °C.

cDNA for qPCR was synthesized from RNA using the SuperScript III First Strand Synthesis kit (Invitrogen) and stored at –20 °C. Guanylate kinase (*gmk*), DNA gyrase subunit B (*gyrB*), and 16S ribosomal RNA (*rpsH*) were used as reference genes for *S. typhimurium*. Quantitative PCR primers for each transcript of interest and the reference transcripts were designed based on the NCBI *E. coli* K-12 MG1655 genomic sequence (Refseq NC\_000913) or the NCBI *S. typhimurium* LT2 genomic sequence (Refseq NC\_003197) using Primer3Plus software (20) (Table S1). Primers were designed under the following constraints: amplicon size was 130–160 bp, the calculated primer melting temperature was ~55 °C, GC content was 45–55%, and probabilities of primer-dimer/hairpin formations were minimized. Primer specificity was confirmed via standard Taq polymerase PCR on genomic DNA. qPCR using LightCycler 480 SYBR Green I Master Kit (Roche Applied Science) were prepared manually according to the manufacturer's instructions. qPCR were performed with a total volume of 20  $\mu$ L, containing 0.5  $\mu$ M of forward primers and 0.5  $\mu$ M of reverse primers and 10  $\mu$ L 2 $\times$  480 SYBR Green Master Mix. Reactions were carried out in white LightCycler 480 96-well plates (Roche). One negative control (replacing cDNA with

PCR H<sub>2</sub>O) was performed for each primer set in all qPCR runs. PCR parameters were denaturation (95 °C for 10 min) and 30–35 cycles of three-segment amplification (95 °C for 10 s, 50–52 °C for 10 s, and 72 °C for 10 s). The thermal-cycling program was concluded with a dissociation curve (65 °C ramped to 95 °C, 10 s at each 1 °C interval) to detect nonspecific amplification or primer-dimer formation. C<sub>t</sub> values were obtained using standard methods (21). Alkyl hydroperoxide reductase (*ahpF*) was excluded from final analyses because induction of this gene could not be detected after treatment with 60  $\mu$ M hydrogen peroxide, possibly due to error in the primers used here (Fig. S3).

**Induction of OxyR.** Hydrogen peroxide treatment was performed as follows. Cultures were inoculated 1:200 (*E. coli*) or 1:500 (*S. typhimurium*) from overnight LB cultures into M9CG (1 mL in 14-mL Falcon tubes or 150  $\mu$ L in 96-well plates) and allowed to grow to exponential phase (3.5 h) or stationary phase (24 h) at 37 °C. Cultures were incubated 1 h with the indicated concentration of hydrogen peroxide before treatment with antibiotics. Serial dilution plating was performed before and after 1 h of hydrogen peroxide incubation and after 3 h of ofloxacin treatment to determine survival at each stage.

***C. elegans* Intestinal Model for *S. typhimurium* Infection.** The temperature-sensitive germ line proliferation (*glp*) mitogen-activated protein kinase kinase (*sek*) mutant strain AU37 [*glp-4* (*bn2*) I; *sek-1* (*km4*) X] of *C. elegans* (Caenorhabditis Genetics Center) was used as a model organism for *Salmonella* pathogenesis in the host intestine. *C. elegans* cultures were synchronized from 10–14 100-cm agar plates using a standard protocol (22). Synchronized L1 larvae were washed to remove dauer pheromone and grown 3–4 d in S-medium (22) + concentrated *E. coli* OP50 at 25 °C with shaking at 200 rpm to allow the larvae to reach adulthood. Synchronized cultures of adult *C. elegans* were then sucrose-washed to remove OP50 and other debris (23) and resuspended in 1 mL S-medium with *E. coli* EMG2  $\Delta$ *tnaA* Pro as a food source (50 $\times$  concentrated from overnight stationary-phase cultures in LB, 100  $\mu$ L food per mL worm culture). Indole (0 or 125  $\mu$ M) was added with bacteria, and worm cultures were incubated 24 h at 25 °C to acclimatize worms. *S. typhimurium*  $\Delta$ *narV*:CmR was then grown to late exponential/early stationary phase in LB, then spun down and resuspended at 50 $\times$  concentration; 25  $\mu$ L of concentrated *S. typhimurium* cultures were introduced to 1 mL worm culture, and cultures were incubated for 12 h at 25 °C to allow establishment of the initial infection, after which cultures were washed 4 $\times$  in M9 worm buffer (22) to remove external pathogens and incubated 24 h further on *E. coli* (100  $\mu$ L 50 $\times$  food per mL worm culture as previously described) in S-medium  $\pm$  indole to allow *Salmonella* infection to progress. Cultures were then treated with 2  $\mu$ g/mL ciprofloxacin; higher concentrations were used here than in in vitro experiments because the worm represents a barrier to diffusion of the drug.

At 0 and 24 h antibiotic treatment, samples of *C. elegans* cultures were washed 6 $\times$  in M9 worm buffer to remove external bacteria, and internal bacteria were harvested by mechanical disruption of worms in M9 worm buffer + 0.5% (vol/vol) Triton X-100 + 5% (wt/vol) SDS. Internal bacteria were pelleted by centrifugation (2 min at 13,500  $\times$  g in a tabletop centrifuge), washed 3 $\times$  in M9 worm buffer to remove Triton X-100 and SDS, and dilution-plated on selective media to determine cfu/mL. Subsamples (25–100  $\mu$ L) of undisrupted worm culture were paralyzied with 10% sodium azide, dropped on LB agar, and counted under a dissection microscope to determine worms/mL; this number was used to calculate average cfu/worm.

These experiments were repeated using *E. coli* EMG2 wild type or  $\Delta$ *tnaA* pZS4-mCherry as a food source and *S. typhimurium* pZA21-GFP as the infectious agent. After 24–48 h development

of *Salmonella* infection, samples of worm culture were washed and mounted on 2% agar slides for fluorescent microscopy. Images were collected at 10× magnification [Plan apochromat (Apo) VC 100×] using an Eclipse Ti epifluorescence inverted microscope (Nikon Instruments, Inc.) equipped with the Perfect Focus System, a ProScan II three-dimensional (XYZ)-motorized stage (Prior Scientific, Inc.), and a CoolSNAP HQ<sup>2</sup> charge-coupled device (CCD) camera (Photometrics) and controlled by the Nikon Instruments software (NIS)-Elements Advanced Research software (Nikon Instruments, Inc.). Images were acquired in the differential interference contrast (DIC) configuration and in the GFP (FITC) and mCherry (TRITC) fluorescent channels, using a motorized fluorescence excitation and emission filter turret with a fluorescent channel filter set (Chroma Technology Corp.), a Lambda SC SmartShutter (Sutter Instrument), and an Intensilight C-Mercury Fiber Illuminator, motorized (HGFIE) mercury fluorescent lamp (Nikon Instruments, Inc.). Images were auto-scaled after acquisition to reduce background in the fluorescence channels. Quantitation of relative bacterial load per worm from the fluorescence microscopy channels was deemed intractable due to the ubiquitous presence of saturated pixels and the inadequacy of single 2D epifluorescence images to

convey infection intensity across the *z* axis in the nematode intestine.

To determine whether indole production by *E. coli* could affect *Salmonella* persistence in the worm model, synchronized cultures of adult *C. elegans* were incubated in modified S-medium (pH ~7, adjusted with 10N NaOH) with 0–1 mM tryptophan using *E. coli* EMG2 Pro or  $\Delta$ tnaA Pro as a food source. When prepared according to standard protocols, fresh S-medium has pH ~5.5, and indole production in *E. coli* is inefficient under acidic conditions (24, 25). Cultures were incubated as previously described for 24 h to allow production of indole before infection. After 24 h, *S. typhimurium*  $\Delta$ narV::CmR (50× concentrated culture prepared as previously described) was introduced, and infection was permitted to develop for 48 h; cultures were not washed to remove external pathogens during this step, as this would remove any *E. coli*-produced indole from the medium. Antibiotic treatment, worm disruption, and cfu/worm counts were performed as described above. *T* tests conducted for these data were one-sided, as data from batch culture experiments indicated that the presence of indole could be expected to increase survival of *Salmonella*, and this expectation could be tested against a null hypothesis of no difference.

- Bachmann BJ (1972) Pedigrees of some mutant strains of *Escherichia coli* K-12. *Bacteriol Rev* 36(4):525–557.
- Hayashi K, et al. (2006) Highly accurate genome sequences of *Escherichia coli* K-12 strains MG1655 and W3110. *Mol Syst Biol* 2:2006.0007.
- Swords WE, Cannon BM, Benjamin WH, Jr. (1997) Avirulence of LT2 strains of *Salmonella typhimurium* results from a defective *rpoS* gene. *Infect Immun* 65(6):2451–2453.
- Wilmes-Riesenberg MR, Foster JW, Curtiss R, 3rd (1997) An altered *rpoS* allele contributes to the avirulence of *Salmonella typhimurium* LT2. *Infect Immun* 65(1):203–210.
- Baba T, et al. (2006) Construction of *Escherichia coli* K-12 in-frame, single-gene knockout mutants: The Keio collection. *Mol Syst Biol* 2:2006.0008.
- Datsenko KA, Wanner BL (2000) One-step inactivation of chromosomal genes in *Escherichia coli* K-12 using PCR products. *Proc Natl Acad Sci USA* 97(12):6640–6645.
- Kibbe WA (2007) OligoCalc: An online oligonucleotide properties calculator. *Nucleic Acids Res* 35(Suppl 2):W43–W46.
- Lutz R, Bujard H (1997) Independent and tight regulation of transcriptional units in *Escherichia coli* via the LacR/O, the TetR/O and AraC/I1-12 regulatory elements. *Nucleic Acids Res* 25(6):1203–1210.
- Wiuff C, Andersson DI (2007) Antibiotic treatment in vitro of phenotypically tolerant bacterial populations. *J Antimicrob Chemother* 59(2):254–263.
- Andrews JM (2001) Determination of minimum inhibitory concentrations. *J Antimicrob Chemother* 48(Suppl 1):5–16.
- Keren I, Kaldalu N, Spoering A, Wang YP, Lewis K (2004) Persister cells and tolerance to antimicrobials. *FEMS Microbiol Lett* 230(1):13–18.
- Keren I, Shah D, Spoering A, Kaldalu N, Lewis K (2004) Specialized persister cells and the mechanism of multidrug tolerance in *Escherichia coli*. *J Bacteriol* 186(24):8172–8180.
- Ashby MJ, Neale JE, Knott SJ, Critchley IA (1994) Effect of antibiotics on non-growing planktonic cells and biofilms of *Escherichia coli*. *J Antimicrob Chemother* 33(3):443–452.
- Eng RH, Padberg FT, Smith SM, Tan EN, Cherubin CE (1991) Bactericidal effects of antibiotics on slowly growing and nongrowing bacteria. *Antimicrob Agents Chemother* 35(9):1824–1828.
- Sufya N, Allison DG, Gilbert P (2003) Clonal variation in maximum specific growth rate and susceptibility towards antimicrobials. *J Appl Microbiol* 95(6):1261–1267.
- McClelland M, et al. (2001) Complete genome sequence of *Salmonella enterica* serovar Typhimurium LT2. *Nature* 413(6858):852–856.
- Lee HH, Molla MN, Cantor CR, Collins JJ (2010) Bacterial charity work leads to population-wide resistance. *Nature* 467(7311):82–85.
- Kobayashi A, Hirakawa H, Hirata T, Nishino K, Yamaguchi A (2006) Growth phase-dependent expression of drug exporters in *Escherichia coli* and its contribution to drug tolerance. *J Bacteriol* 188(16):5693–5703.
- Hirakawa H, Kodama T, Takumi-Kobayashi A, Honda T, Yamaguchi A (2009) Secreted indole serves as a signal for expression of type III secretion system translocators in enterohaemorrhagic *Escherichia coli* O157: H7. *Microbiology* 155:541–550.
- Untergasser A, et al. (2007) Primer3Plus, an enhanced web interface to Primer3. *Nucleic Acids Res* 35(Web Server issue, suppl 2):W71–4.
- Livak KJ, Schmittgen TD (2001) Analysis of relative gene expression data using real-time quantitative PCR and the  $2^{-\Delta\Delta C(T)}$  Method. *Methods* 25(4):402–408.
- Stiernagle T (2006) Maintenance of *C. elegans*. *WormBook*, ed the *C. elegans* Research Community (WormBook), 10.1895/wormbook.1.101.1. Available at [www.wormbook.org](http://www.wormbook.org).
- Portman DS (2006) Profiling *C. elegans* gene expression with DNA microarrays. *WormBook*, ed the *C. elegans* Research Community (WormBook), 10.1895/wormbook.1.104.1. Available at [www.wormbook.org](http://www.wormbook.org).
- Blankenhorn D, Phillips J, Slonczewski JL (1999) Acid- and base-induced proteins during aerobic and anaerobic growth of *Escherichia coli* revealed by two-dimensional gel electrophoresis. *J Bacteriol* 181(7):2209–2216.
- Han TH, Lee JH, Cho MH, Wood TK, Lee J (2011) Environmental factors affecting indole production in *Escherichia coli*. *Res Microbiol* 162(2):108–116.

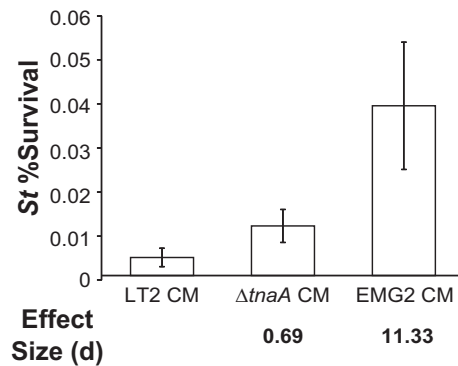

**Fig. S1.** *E. coli*-produced indole in conditioned media induces antibiotic tolerance in *Salmonella typhimurium*. Conditioned media was prepared by inoculating M9CG + 1 mM tryptophan with *S. typhimurium* LT2, EMG2 wild type, and EMG2  $\Delta tnaA$  and growing to stationary phase; *S. typhimurium* was grown to exponential phase in 30% fresh/70% conditioned media and treated with ciprofloxacin (0.5  $\mu\text{g}/\text{mL}$ ). *S. typhimurium*-conditioned media was used as the control condition, and Cohen's effect sizes ( $d$ ) were calculated with respect to this condition. Bars represent mean  $\pm$  SD of seven biological replicates. Exposure to  $\Delta tnaA$ -conditioned media did not have a large effect on *Salmonella* tolerance compared with exposure to *S. typhimurium*-conditioned medium ( $d = 0.69$ ), whereas exposure to media conditioned by wild-type *E. coli* did have a large effect on tolerance relative to the control ( $d = 11.33$ ), indicating that most if not all of the increase in tolerance upon exposure to *E. coli* is due to the effects of indole signaling.

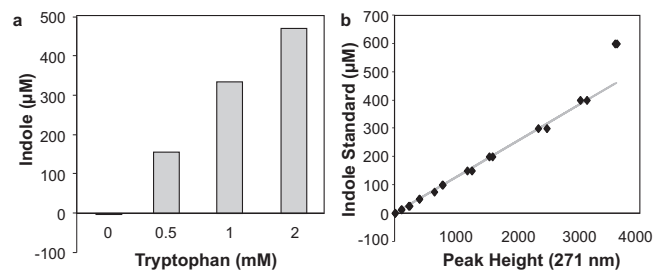

**Fig. S2.** Indole production as determined by HPLC. (A) Indole concentrations in conditioned *E. coli* medium. Wild-type *E. coli* was grown to stationary phase (16 h) in M9CG + indicated concentrations of tryptophan. (B) Linear regression against a series of indole concentration standards in M9CG was used to calculate indole concentration in conditioned media (calculated regression line:  $m = -1.64$ ,  $b = 0.127$ ).

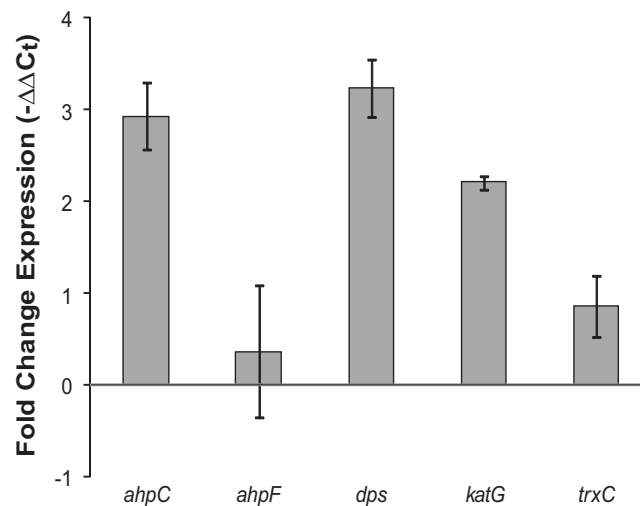

**Fig. S3.** qPCR of OxyR regulon genes after treatment of *S. typhimurium* with hydrogen peroxide. Exponential-phase (3.5 h) cultures of *S. typhimurium* in M9CG were treated with 60  $\mu\text{M}$   $\text{H}_2\text{O}_2$  for 15 min. Bars represent mean  $\pm$  SD of three biological replicates.



**Table S1. Bacterial strains, plasmids, and primers used in this study**

| Strains and primers                              | Genotype or sequence                                                        |
|--------------------------------------------------|-----------------------------------------------------------------------------|
| <i>E. coli</i> K12 strains                       |                                                                             |
| EMG2                                             | Wild type                                                                   |
| EMG2 <i>tnaA</i>                                 | K12 EMG2 $\Delta$ <i>tnaA</i>                                               |
| EMG2 Pro                                         | K12 EMG2 Pro, Sp <sup>R</sup> , lacR, tetR                                  |
| EMG2 <i>tnaA</i> Pro                             | K12 EMG2 $\Delta$ <i>tnaA</i> Pro, Sp <sup>R</sup> , lacR, tetR             |
| <i>Salmonella typhimurium</i> strains            |                                                                             |
| <i>S. typhimurium</i> LT2                        | Wild type                                                                   |
| LT2 <i>narV</i>                                  | <i>S. typhimurium</i> $\Delta$ <i>narV</i> $\Omega$ Cm <sup>R</sup>         |
| LT2 <i>oxyR</i>                                  | <i>S. typhimurium</i> $\Delta$ <i>oxyR</i> $\Omega$ Cm <sup>R</sup>         |
| LT2 <i>pspBC</i>                                 | <i>S. typhimurium</i> $\Delta$ <i>pspBC</i> $\Omega$ Cm <sup>R</sup>        |
| Knockout confirmation primers                    |                                                                             |
| <i>tnaA</i> Forward                              | CCAGAGCCAAACCGATTAGA                                                        |
| <i>tnaA</i> Reverse                              | ACCATAACACCCCAAATGC                                                         |
| <i>narV</i> Forward                              | CTGGGAAGAAGAACAGGTGAAG                                                      |
| <i>narV</i> Reverse                              | GAAGGCGTCAACATGGTAAATC                                                      |
| mCherry F internal                               | TGTACGGTTCCAAGGCTAC                                                         |
| mCherry R internal                               | CCCATGGTCTTCTTCTGCAT                                                        |
| Sp <sup>R</sup> F internal                       | GGTCACCGTAACCAGCAAT                                                         |
| Sp <sup>R</sup> R internal                       | GCAGTCGCCCTAAAACAAAG                                                        |
| CmR F internal                                   | GGGCGAAGAAGTTGTCCATA                                                        |
| CmR R internal                                   | TCCGGCCTTTATTCACATTC                                                        |
| KmR F internal                                   | AATATCAGGGTAGCCAAAG                                                         |
| KmR R internal                                   | TGCTCCTGCCGAGAAAGTAT                                                        |
| <i>oxyR</i> detect F LT2                         | TAAGTGCGGTCGCGTACAAGG                                                       |
| <i>oxyR</i> detect R LT2                         | CCGCGGTATGGATGTGAAAGTG                                                      |
| <i>pspBC</i> detect F LT2                        | TCCTGTTGAGCCTGAAGAGAAG                                                      |
| <i>pspBC</i> detect R LT2                        | CGACATCGTGAACGCCAATATC                                                      |
| Primers for phage-mediated PCR product knockouts |                                                                             |
| LT2 <i>narV</i> Forward                          | TGAACGGGAAGAGCAGGAAAATAGTCATGTGTAGGCTGGAGCTGCTTCG                           |
| LT2 <i>narV</i> Forward extend                   | TACTCAAACGGCGCGCTCCAGACATGAACCAGACGGGTGAACGGGAAGAGCAGG                      |
| LT2 <i>narV</i> Reverse                          | TGCGCTATGACTACGGACAATATACCTGCGGGAATACCTCCTTAGTTCCTATTC                      |
| LT2 <i>narV</i> Reverse extend                   | TGGCCACGGTATTCTTCTCGGAGTTGGCTGCGCTATGACTACGGAC                              |
| LT2 <i>oxyR</i> Upstream F                       | GGATCCACTAGTTGGCGTCATCATGCACCTG                                             |
| LT2 <i>oxyR</i> Upstream R                       | GCCTACACGCATGCTGCGTAGCCGTTATGAGCAACTG                                       |
| LT2 <i>oxyR</i> AbR F                            | GCTACGCAGCATGCGTGTAGGCTGGAGCTGCTTCG                                         |
| LT2 <i>oxyR</i> AbR R                            | CGGGCGGTGCTCTCGAGCATATGAATATCCTCCTTAGTTCC                                   |
| LT2 <i>oxyR</i> Downstream F                     | CATATGCTCGAGACACCGCCGTTTCAGAGGG                                             |
| LT2 <i>oxyR</i> Downstream R                     | GCGGTGGCGGCCGATACCTGGCTTGACTGCTGCATATGG                                     |
| LT2 <i>oxyR</i> Insert F                         | AAACGCCACGTTGTTCAG                                                          |
| LT2 <i>oxyR</i> Insert R                         | CTATGCTAATGGCCGTACCG                                                        |
| LT2 <i>pspBC</i> Upstream F                      | GGATCCACTAGTCCATATTTCATCGCGTGCCTATAC                                        |
| LT2 <i>pspBC</i> Upstream R                      | GCCTACACGCATGCCGTGTAAGTGATATATCGGGAAGG                                      |
| LT2 <i>pspBC</i> AbR F                           | CTTACAGGCATGCGTGTAGGCTGGAGCTGCTTCG                                          |
| LT2 <i>pspBC</i> AbR R                           | CATGAGCTCGAGCATATGAATATCCTCCTTAGTTCCTATTC                                   |
| LT2 <i>pspBC</i> Downstream F                    | CATATGCTCGAGCTCATGCGTTCTCCTTACAC                                            |
| LT2 <i>pspBC</i> Downstream R                    | GCGGTGGCGGCCGCTTATCCCGTTCGATTGAAC                                           |
| LT2 <i>pspBC</i> Insert F                        | ATTTCATCGCGTGCCTATACCC                                                      |
| LT2 <i>pspBC</i> Insert R                        | ATTGAACAGGCTACGGCTCAG                                                       |
| Rescue plasmid construction                      |                                                                             |
| <i>tnaA</i> cloning F                            | CCGCGCGGTGCGGTACCATGGAAAACTTAAACATCTCCCTG                                   |
| <i>tnaA</i> cloning R                            | CGCGGCGTCTAGAGCTAACATCCTTATAGCCACTCTG                                       |
| Rescue plasmids                                  |                                                                             |
| pZA21G                                           | Kan <sup>R</sup> , P <sub>tetO-1</sub> -GFP                                 |
| pZA21- <i>tnaA</i>                               | derivative of pZA21G; <i>tnaA</i> gene cassette replaces GFP (KpnI/HindIII) |
| qPCR primers                                     |                                                                             |
| LT2 <i>pspA</i> F                                | AGATCGAGTGGCAGGAAAAAG                                                       |
| LT2 <i>pspA</i> Reverse                          | GTGACTTCCTGTTCAAGCGTAG                                                      |
| LT2 <i>pspE</i> F                                | CAGACAGGAACGATACGGTAAA                                                      |
| LT2 <i>pspE</i> Reverse                          | ACTGATACCGCCCATATTCATC                                                      |
| LT2 <i>ahpC</i> F                                | CACAGCAGCTCTGAAACTATCG                                                      |
| LT2 <i>ahpC</i> Reverse                          | CTTCATCTTCACGCATGTTGTC                                                      |
| LT2 <i>ahpF</i> F                                | GAACGAAATCACCGAACGTAAC                                                      |
| LT2 <i>ahpF</i> Reverse                          | CCAGTATCCACTTTAGCGACAA                                                      |

**Table S1. Cont.**

| Strains and primers      | Genotype or sequence   |
|--------------------------|------------------------|
| LT2 <i>trx</i> C F       | ATCTTCCAGTGGTGATCGACTT |
| LT2 <i>trx</i> C Reverse | CTTTGACGAAACGGACTTTACC |
| LT2 <i>dps</i> F         | CACTGACCGATCATCTGGATAC |
| LT2 <i>dps</i> Reverse   | CGGATAGCTTTTCAGTGGAGTT |
| LT2 <i>katG</i> F        | GATCCGGAGTTCGAGAAGATTT |
| LT2 <i>katG</i> Reverse  | GCTTTTGGTCCCATACTCTGT  |
| LT2 <i>nap</i> F F       | GGATCTGGTTTTTACGCTCAC  |
| LT2 <i>nap</i> F Reverse | GATAACGTGGGACGAAAGGTAA |
| LT2 <i>inv</i> F F       | GAATGCTGGGAGAAGACTATGG |
| LT2 <i>inv</i> F Reverse | ACGCCAGTTTCGTAATTCACTC |
| LT2 <i>ram</i> A F       | CACGATTGTCGAGTGGATTG   |
| LT2 <i>ram</i> A Reverse | CCAGACTCTCCCCTTTGTACTG |
| LT2 <i>gmk</i> F         | CACGGTGAGCACTATTTCTTTG |
| LT2 <i>gmk</i> Reverse   | AGTGCCGTAGTAATTGCCAAAC |
| LT2 <i>gyr</i> B F       | AGCGATGGATCAGTACCAGATT |
| LT2 <i>gyr</i> B Reverse | TGGCGTTATATTCAGAGACCAG |

AbR, antibiotic resistance; F/R, forward/reverse; *inv*, invasion protein; KmR, kanamycin resistance; *lac*R, lactose repressor; *mtr*, tryptophan/indole:H<sup>+</sup> symporter; *nap*, nitrate reductase; *ram*A, resistance antibiotic multiple; Sp<sup>R</sup>, spectinomycin resistance; *tet*R, tetracycline repressor; *trx*, thioredoxin.
